# Supplementary material
Source: publisher figshare collection journal article supplement (https://aacr.figshare.com/articles/dataset/_/23782441)

**Supplementary Figure S11- E2 stimulation induces DNA replication stress.** T47D/pInd20-*ESR1* cells were pretreated with HD x 7 d, and then treated with HD + dox x 14 d prior to seeding. All cells were then treated as indicated x 24 h. Cells were fixed and stained for PCNA and with DAPI. PCNA foci were counted in  $\geq 100$  cells per group. \*\*\*\* $p < 0.001$ .

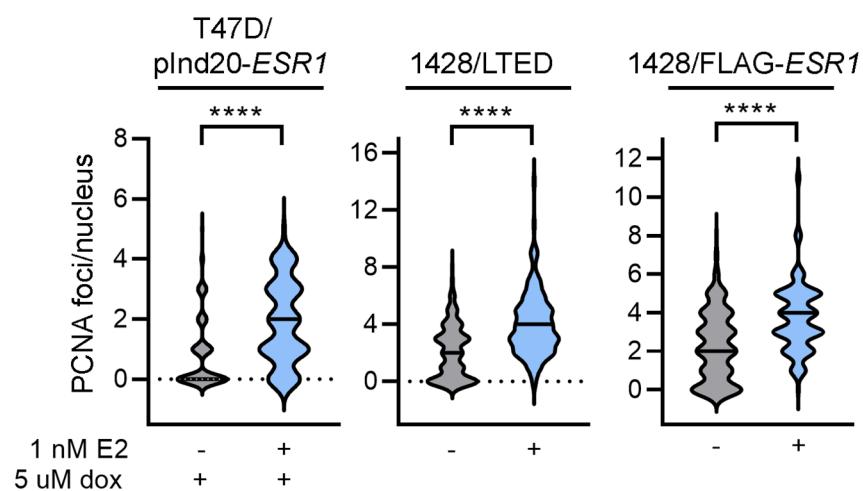

Supplement: Supplementary file 1 [file 41716018]
